# Supplementary material for: Microbiota signatures relating to reduced memory and exploratory behaviour in the offspring of overweight mothers in a murine model
Source: PubMed Central journal article supplement (PMC6717200; doi:10.1038/s41598-019-48090-8), 2019-08-30
Supplement: 41598_2019_48090_MOESM1_ESM.pdf [file 41598_2019_48090_MOESM1_ESM.pdf]

**Microbiota signatures relating to reduced memory and exploratory behaviour in  
the offspring of overweight mothers in a murine model**

Elena Sanguinetti<sup>1,2\*</sup>, Maria Angela Guzzardi<sup>1\*</sup>, Maria Tripodi<sup>1</sup>, Daniele Panetta<sup>1</sup>, Marta Selma-Royo<sup>3</sup>,  
Alessandro Zega<sup>1</sup>, Mauro Telleschi<sup>1</sup>, Maria Carmen Collado<sup>3#</sup>, Patricia Iozzo<sup>1#</sup>

\*Equal contribution to first authorship

#Equal contribution to last authorship

<sup>1</sup>Institute of Clinical Physiology, National Research Council (CNR), via Moruzzi, 56124 Pisa, Italy

<sup>2</sup>Sant'Anna School of Advanced Studies, Pisa, Piazza Santa Caterina, 56100, Pisa, Italy

<sup>3</sup>Institute of Agrochemistry and Food Technology-National Research Council (IATA-CSIC), 46980, Valencia, Spain

**Table S1: Multivariate canonical correspondence analysis (CCA) describing the correlations (p-values reported) between maternal habitus and gut microbiota composition**

|                      | <b>Phylum</b> | <b>Class</b> | <b>Order</b> | <b>Family</b> | <b>Genus</b> | <b>OTU</b>   |
|----------------------|---------------|--------------|--------------|---------------|--------------|--------------|
| <b>Age: 1 month</b>  |               |              |              |               |              |              |
| <b>Ceacum</b>        | 0.597         | 0.575        | 0.756        | 0.736         | 0.608        | 0.465        |
| <b>Colon</b>         | 0.322         | 0.212        | 0.241        | 0.096         | <b>0.041</b> | <b>0.021</b> |
| <b>Age: 6 months</b> |               |              |              |               |              |              |
| <b>Caecum</b>        | <b>0.016</b>  | <b>0.034</b> | <b>0.013</b> | <b>0.016</b>  | <b>0.02</b>  | <b>0.015</b> |
| <b>Colon</b>         | <b>0.014</b>  | <b>0.017</b> | <b>0.014</b> | <b>0.011</b>  | <b>0.004</b> | <b>0.002</b> |

Statistically significant p-values are bolded

**Table S2: Correlations between colon microbiota taxa, body weight and food intake.**

| <b>Bacteria Level</b>                | <b>Bacteria taxa</b>               | <b>R</b>    | <b>p</b>       | <b>FDR</b>   |
|--------------------------------------|------------------------------------|-------------|----------------|--------------|
| <b>Weight at weaning</b>             |                                    |             |                |              |
| Phylum                               | Bacteroidetes                      | 0.47        | 0.02320        | 0.16         |
| Class                                | Bacteroidia                        | 0.47        | 0.02320        | 0.28         |
| Order                                | Bacteroidales                      | 0.47        | 0.02320        | 0.37         |
| Family                               | Clostridiaceae                     | -0.6        | 0.00239        | 0.067        |
| Family                               | S247                               | 0.48        | 0.02068        | 0.17         |
| * Family                             | Peptostreptococcaceae              | -0.47       | 0.02437        | 0.17         |
| * Family                             | Rikenellaceae                      | -0.47       | 0.02490        | 0.17         |
| Genus                                | Unclassified.Clostridiaceae        | -0.6        | 0.00225        | 0.088        |
| Genus                                | Unclassified.S247                  | 0.48        | 0.02068        | 0.24         |
| * Genus                              | Unclassified.Peptostreptococcaceae | -0.47       | 0.02437        | 0.24         |
| * Genus                              | Unclassified.Rikenellaceae         | -0.47       | 0.02490        | 0.24         |
| Genus                                | Unclassified                       | 0.41        | 0.04984        | 0.39         |
| <b>Weight at 6 months</b>            |                                    |             |                |              |
| Phylum                               | Unclassified                       | 0.59        | 0.01054        | 0.074        |
| Class                                | Unclassified                       | 0.59        | 0.01007        | 0.12         |
| Order                                | Unclassified                       | 0.59        | 0.01007        | 0.17         |
| Family                               | Peptostreptococcaceae              | -0.62       | 0.00614        | 0.2          |
| * Family                             | Rikenellaceae                      | 0.49        | 0.03710        | 0.38         |
| Family                               | Unclassified                       | 0.47        | 0.04879        | 0.38         |
| * Family                             | Porphyromonadaceae                 | 0.45        | 0.06040        | 0.38         |
| Genus                                | Unclassified.Peptostreptococcaceae | -0.62       | 0.00614        | 0.29         |
| Genus                                | Bilophila                          | 0.52        | 0.02744        | 0.49         |
| * Genus                              | Unclassified.Rikenellaceae         | 0.49        | 0.03710        | 0.49         |
| * Genus                              | Parabacteroides                    | 0.45        | 0.06040        | 0.49         |
| <b>Daily food intake at 6 months</b> |                                    |             |                |              |
| <b>Phylum</b>                        | <b>Unclassified</b>                | <b>0.63</b> | <b>0.00490</b> | <b>0.034</b> |
| * Phylum                             | Proteobacteria                     | 0.53        | 0.02221        | 0.078        |
| <b>Class</b>                         | <b>Unclassified</b>                | <b>0.64</b> | <b>0.00452</b> | <b>0.031</b> |
| * <b>Class</b>                       | <b>Deltaproteobacteria</b>         | <b>0.63</b> | <b>0.00517</b> | <b>0.031</b> |
| <b>Order</b>                         | <b>Unclassified</b>                | <b>0.64</b> | <b>0.00452</b> | <b>0.044</b> |
| * <b>Order</b>                       | <b>Desulfovibrionales</b>          | <b>0.63</b> | <b>0.00517</b> | <b>0.044</b> |
| * Order                              | Bifidobacteriales                  | 0.57        | 0.01389        | 0.079        |
| * Order                              | Actinomycetales                    | -0.49       | 0.04067        | 0.17         |
| * Family                             | Desulfovibrionaceae                | 0.63        | 0.00517        | 0.068        |
| * Family                             | Rikenellaceae                      | 0.61        | 0.00703        | 0.068        |
| Family                               | Peptostreptococcaceae              | -0.61       | 0.00724        | 0.068        |
| Family                               | Unclassified                       | 0.6         | 0.00849        | 0.068        |
| * Family                             | Bifidobacteriaceae                 | 0.57        | 0.01389        | 0.089        |
| * Genus                              | Unclassified.Rikenellaceae         | 0.61        | 0.00703        | 0.17         |
| Genus                                | Unclassified.Peptostreptococcaceae | -0.61       | 0.00724        | 0.17         |
| Genus                                | Bifidobacterium                    | 0.57        | 0.01389        | 0.17         |
| Genus                                | Unclassified                       | 0.57        | 0.01419        | 0.17         |
| * Genus                              | Desulfovibrio                      | 0.55        | 0.01747        | 0.17         |
| Genus                                | Adlercreutzia                      | 0.48        | 0.04237        | 0.34         |

Correlations remaining statistically significant after FDR correction are in bold. Bacterial taxa associated with at least one of the cognitive parameters (alternation triplets, arm entries, distance) and/or maternal habitus are indicated with an asterisk (\*)

**Table S3. Multivariate canonical correspondence analysis (CCA) describing the correlations (p-values reported) between maternal habitus and expression of KEGG pathways inferred from gut microbiota**

|                      | <b>p-value</b> |
|----------------------|----------------|
| <b>Age: 1 month</b>  |                |
| Caecum               | 0.658          |
| Colon                | 0.292          |
| <b>Age: 6 months</b> |                |
| Caecum               | 0.115          |
| Colon                | <b>0.050</b>   |

Statistically significant p-values are bolded

**Figure S1 Bacterial taxa at OTU level identified by LEfSE analysis**

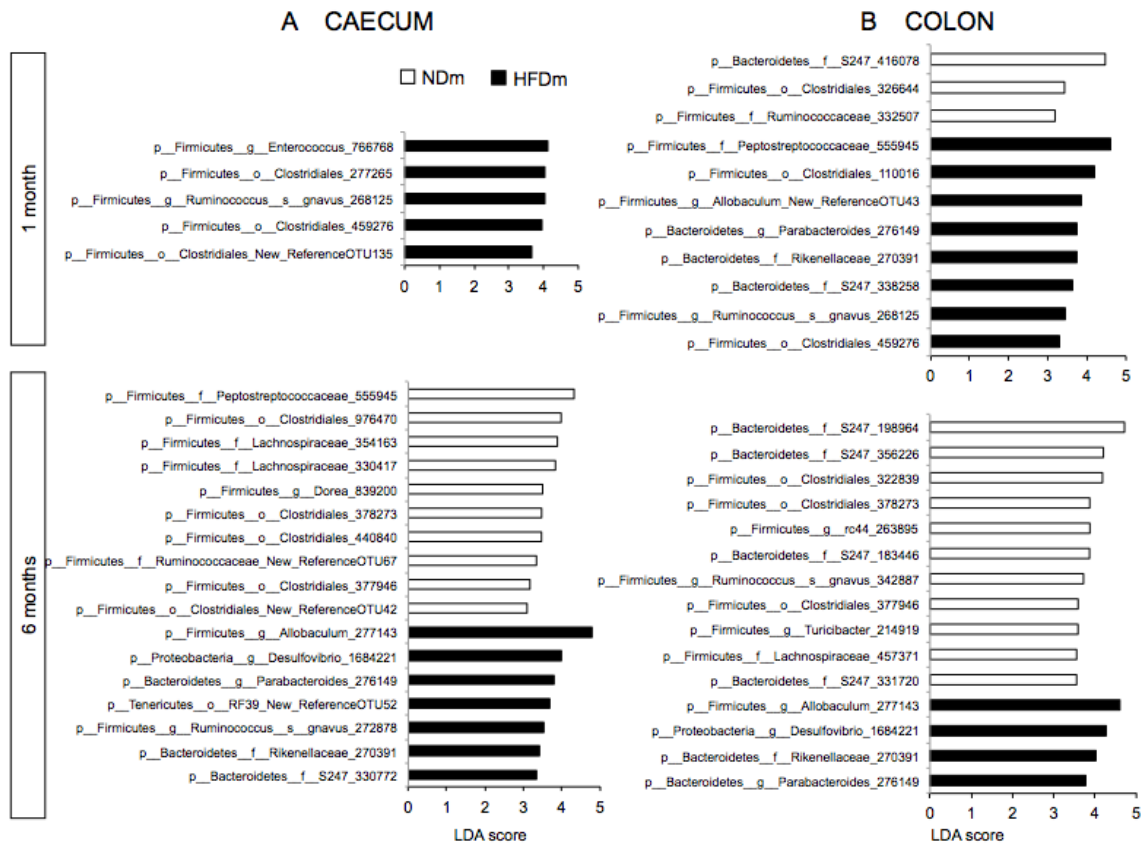

Fig. S1. Bacterial taxa at OTU level identified by LEfSE analysis (LDA score > 3), and explaining the difference in microbiota composition in the caecum (A) and in the colon (B) between offspring of mothers fed normal diet (NDm) or high-fat diet (HFDm) at 1 (top panel) and 6 months of age (bottom panel).

**Figure S2. Colon microbiota-derived Kyoto Encyclopaedia of Genes and Genomes (KEGG)**

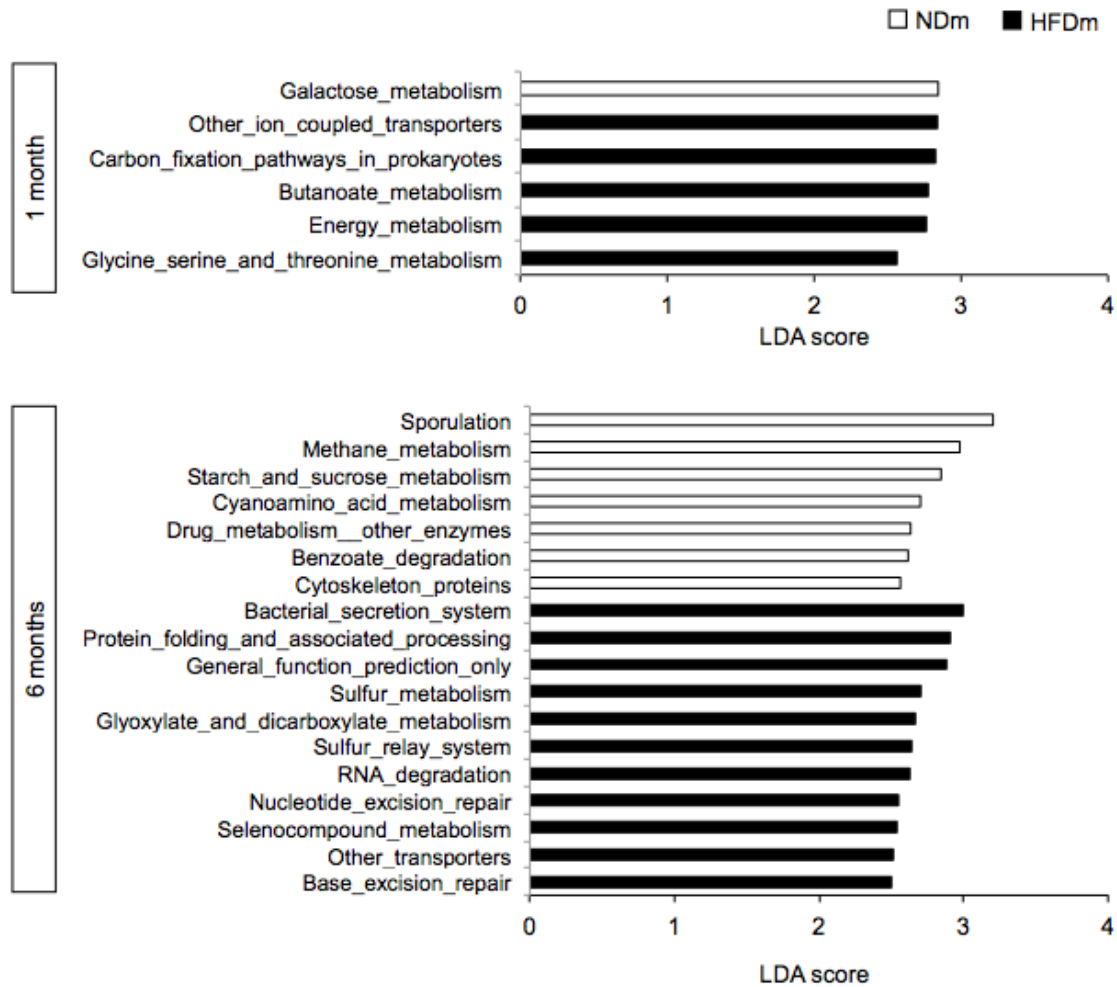

Fig. S2. Colon microbiota-derived Kyoto Encyclopaedia of Genes and Genomes (KEGG) pathways explaining functional microbiota differences between offspring of mothers fed normal diet (NDm) or high-fat diet (HFDm) at 1 (top panel) and 6 months of age (bottom panel).
